# Supplementary material for: A Compositional Model to Predict the Aggregated Isotope Distribution for Average DNA and RNA Oligonucleotides
Source: Metabolites. 2021 Jun 18;11(6):400. doi: 10.3390/metabo11060400 (PMC8234063; doi:10.3390/metabo11060400)
Supplement: Supplementary file 1 [file metabolites-11-00400-s001.zip › Table S5.xlsx]

## Sheet: Info
Name	Type	Sequence	Elemental Formula	Molecular Weight (Monoisotopic)	Molecular Weight (Average)
DNA_SHORT1	DNA	GCC ACA TAT GAG AGT GGA TTT GTC ATT	C266H334N100O162P26	8325.41	8329.4
DNA_SHORT2	DNA	GGT GCC CCA GAA TCT CTC AGC CT	C221H282N82O137P22	6957.18	6960.5
RNA-LIKE	RNA	Am*-Af*-Cm*-Af-Um-Uf-Gm-Af-Gm-Cf-Gm-Af-Um-Gf-Um-Cf-Cm*-Am-Cm	C192H239O117N73P18S4F8	6275.9	6279.13
DNA_LONG	DNA	GAG ATC TCT GCT TCT GAT GGC TCT CTG GTT ACT GCC AGT TGA ATC TG	C459H582N162O290P46	14426.4	14433.2

## Sheet: DNA_SHORT1
z	Isotope	MW	Intensity	z	Isotope	MW	Intensity	z	Isotope	MW	Intensity	z	Isotope	MW	Intensity	z	Isotope	MW	Intensity	z	Isotope	MW	Intensity	z	Isotope	MW	Intensity	z	Isotope	MW	Intensity	z	Isotope	MW	Intensity	z	Isotope	MW	Intensity
12	0	8325.44	807	12	0	8325.57	1112	12	0	8325.57	2329	12	0	8325.57	2666	12	0	8325.57	3414	12	0	8325.57	3479	12	0	8325.57	4132	12	0	8325.57	6375	12	0	8325.44	5614	12	0	8325.44	6106
12	1	8326.54	2980	12	1	8326.54	5464	12	1	8326.54	5875	12	1	8326.54	7924	12	1	8326.54	10649	12	1	8326.54	11202	12	1	8326.54	16041	12	1	8326.54	20109	12	1	8326.54	19368	12	1	8326.54	21092
12	2	8327.51	5926	12	2	8327.51	8463	12	2	8327.51	11490	12	2	8327.51	15258	12	2	8327.51	17859	12	2	8327.51	22602	12	2	8327.51	31692	12	2	8327.51	33883	12	2	8327.51	33178	12	2	8327.51	39101
12	3	8328.48	5793	12	3	8328.48	10885	12	3	8328.48	13794	12	3	8328.48	17370	12	3	8328.48	21234	12	3	8328.62	23372	12	3	8328.48	37476	12	3	8328.48	42757	12	3	8328.48	43142	12	3	8328.48	41160
12	4	8329.59	5647	12	4	8329.59	10197	12	4	8329.59	14275	12	4	8329.59	16740	12	4	8329.59	19746	12	4	8329.59	25070	12	4	8329.45	32500	12	4	8329.59	38288	12	4	8329.59	38239	12	4	8329.59	38994
12	5	8330.56	5158	12	5	8330.56	8569	12	5	8330.56	13160	12	5	8330.56	13631	12	5	8330.56	17839	12	5	8330.56	24110	12	5	8330.56	26915	12	5	8330.56	32314	12	5	8330.56	34588	12	5	8330.56	35794
12	6	8331.53	4136	12	6	8331.53	7044	12	6	8331.53	7804	12	6	8331.53	8762	12	6	8331.53	11491	12	6	8331.53	14070	12	6	8331.53	19726	12	6	8331.53	20843	12	6	8331.53	22229	12	6	8331.53	24638
12	7	8332.5	2401	12	7	8332.5	3895	12	7	8332.5	5112	12	7	8332.5	6210	12	7	8332.5	6464	12	7	8332.5	10430	12	7	8332.64	11429	12	7	8332.5	13553	12	7	8332.5	12902	12	7	8332.5	16631
12	8	8333.47	1196	12	8	8333.61	2218	12	8	8333.47	2893	12	8	8333.61	3440	12	8	8333.61	4038	12	8	8333.61	5806	12	8	8333.61	6352	12	8	8333.47	7535	12	8	8333.47	7293	12	8	8333.61	8550
12	9	8334.44	552	12	9	8334.44	981	12	9	8334.44	1660	12	9	8334.44	1708	12	9	8334.58	1983	12	9	8334.58	2674	12	9	8334.58	4358	12	9	8334.58	4244	12	9	8334.58	4942	12	9	8334.58	4174
12	10	8335.55	261	12	10	8335.69	405	12	10	8335.55	772	12	10	8335.41	806	12	10	8335.41	767	12	10	8335.55	1335	12	10	8335.41	1720	12	10	8335.55	2819	12	10	8335.55	2109	12	10	8335.41	1736
12	11	8336.52	144	12	11	8336.52	414	12	11	8336.8	204	12	11	8336.52	528	12	11	8336.52	473	12	11	8336.52	854	12	11	8336.52	722	12	11	8336.52	1259	12	11	8336.52	1116	12	11	8336.66	936
12	12	8337.49	171	12	12	8337.9	108	12	12	8337.49	371	12	12	8337.63	262	12	12	8337.9	153	12	12	8337.49	251	12	12	8337.35	407	12	12	8337.49	835	12	12	8337.63	628	12	12	8337.49	685
12	13	8338.32	135	12	13	0	0	12	13	8338.18	172	12	13	8338.74	223	12	13	8338.74	339	12	13	8338.32	160	12	13	8338.6	246	12	13	8338.32	369	12	13	8338.74	326	12	13	8338.32	245
12	14	0	0	12	14	8340.12	60	12	14	8340.26	99	12	14	8339.84	152	12	14	8339.71	74	12	14	8339.43	142	12	14	8339.71	126	12	14	8339.71	158	12	14	8339.98	227	12	14	8339.98	160
11	0	8325.54	737	11	0	8325.54	1591	11	0	8325.54	1555	11	0	8325.54	1679	11	0	8325.54	1140	11	0	8325.54	2094	11	0	8325.54	1721	11	0	8325.54	2406	11	0	8325.41	2474	11	0	8325.54	2566
11	1	8326.47	3146	11	1	8326.47	3285	11	1	8326.47	3813	11	1	8326.47	5151	11	1	8326.47	4998	11	1	8326.47	5639	11	1	8326.47	7541	11	1	8326.47	8089	11	1	8326.47	7306	11	1	8326.47	7806
11	2	8327.53	5137	11	2	8327.53	6175	11	2	8327.53	7011	11	2	8327.53	7528	11	2	8327.53	8410	11	2	8327.53	10669	11	2	8327.53	12786	11	2	8327.53	14054	11	2	8327.53	14234	11	2	8327.53	13750
11	3	8328.46	5816	11	3	8328.46	6889	11	3	8328.46	10350	11	3	8328.59	9590	11	3	8328.59	11745	11	3	8328.59	13243	11	3	8328.46	16583	11	3	8328.59	15991	11	3	8328.59	16803	11	3	8328.46	18078
11	4	8329.52	5862	11	4	8329.52	7325	11	4	8329.52	8905	11	4	8329.52	9017	11	4	8329.52	10965	11	4	8329.52	12347	11	4	8329.52	17395	11	4	8329.52	17463	11	4	8329.52	17252	11	4	8329.52	18452
11	5	8330.58	3892	11	5	8330.58	5987	11	5	8330.58	7244	11	5	8330.58	7715	11	5	8330.58	8598	11	5	8330.58	10209	11	5	8330.45	13831	11	5	8330.58	13713	11	5	8330.58	13347	11	5	8330.58	14592
11	6	8331.51	2209	11	6	8331.51	4785	11	6	8331.51	5073	11	6	8331.51	6251	11	6	8331.51	6651	11	6	8331.51	7848	11	6	8331.51	9296	11	6	8331.51	9092	11	6	8331.51	9459	11	6	8331.51	9472
11	7	8332.57	1806	11	7	8332.44	2251	11	7	8332.44	2971	11	7	8332.57	3481	11	7	8332.57	4266	11	7	8332.57	5066	11	7	8332.44	5702	11	7	8332.57	5460	11	7	8332.57	5304	11	7	8332.57	5753
11	8	8333.5	978	11	8	8333.5	1361	11	8	8333.5	1347	11	8	8333.5	1681	11	8	8333.5	1891	11	8	8333.5	3037	11	8	8333.5	3051	11	8	8333.5	3300	11	8	8333.5	3046	11	8	8333.5	3301
11	9	8334.56	623	11	9	8334.43	773	11	9	8334.56	755	11	9	8334.56	916	11	9	8334.56	1259	11	9	8334.56	1513	11	9	8334.56	1929	11	9	8334.56	1527	11	9	8334.56	1980	11	9	8334.43	1982
11	10	8335.49	181	11	10	8335.49	382	11	10	8335.36	249	11	10	8335.63	462	11	10	8335.49	432	11	10	8335.49	571	11	10	8335.63	655	11	10	8335.63	611	11	10	8335.49	974	11	10	8335.49	879
11	11	8336.42	166	11	11	8336.29	109	11	11	8336.69	125	11	11	8336.42	114	11	11	8336.42	148	11	11	8336.42	255	11	11	8336.29	569	11	11	8336.55	651	11	11	8336.42	352	11	11	8336.55	476
11	12	8337.88	82	11	12	8337.48	223	11	12	8337.75	116	11	12	8337.35	106	11	12	8337.75	118	11	12	8337.75	168	11	12	8337.62	170	11	12	8337.48	290	11	12	8337.62	157	11	12	8337.48	196
11	13	8338.54	124	11	13	8338.54	122	11	13	8338.54	61	11	13	8338.81	110	11	13	8338.81	72	11	13	8338.54	94	11	13	8338.28	138	11	13	8338.41	165	11	13	8338.15	108	11	13	8338.54	100
11	14	8339.08	58	11	14	0	0	11	14	8339.61	64	11	14	0	0	11	14	0	0	11	14	8339.87	164	11	14	8339.61	145	11	14	8339.34	73	11	14	8339.47	120	11	14	8339.61	91
10	0	8325.55	233	10	0	8325.43	352	10	0	8325.55	238	10	0	8325.55	490	10	0	8325.43	802	10	0	8325.55	728	10	0	8325.43	1420	10	0	8325.55	974	10	0	8325.55	1016	10	0	8325.43	880
10	1	8326.56	646	10	1	8326.56	1245	10	1	8326.44	1276	10	1	8326.56	1485	10	1	8326.44	1191	10	1	8326.56	1506	10	1	8326.56	3183	10	1	8326.56	3120	10	1	8326.44	3483	10	1	8326.44	3416
10	2	8327.58	1157	10	2	8327.58	1198	10	2	8327.58	1683	10	2	8327.58	2249	10	2	8327.58	3073	10	2	8327.58	3120	10	2	8327.58	5158	10	2	8327.58	6212	10	2	8327.45	6479	10	2	8327.58	6174
10	3	8328.59	1231	10	3	8328.59	1857	10	3	8328.46	2454	10	3	8328.46	3013	10	3	8328.59	3423	10	3	8328.59	3908	10	3	8328.59	6929	10	3	8328.59	7563	10	3	8328.59	6422	10	3	8328.46	7324
10	4	8329.47	1580	10	4	8329.47	2047	10	4	8329.6	2324	10	4	8329.47	2762	10	4	8329.6	3126	10	4	8329.6	3708	10	4	8329.6	7288	10	4	8329.47	6978	10	4	8329.47	6548	10	4	8329.47	8165
10	5	8330.48	1075	10	5	8330.48	1386	10	5	8330.61	1972	10	5	8330.61	2318	10	5	8330.48	2500	10	5	8330.48	3386	10	5	8330.48	5748	10	5	8330.48	6574	10	5	8330.48	6568	10	5	8330.48	5563
10	6	8331.5	785	10	6	8331.5	1357	10	6	8331.62	1038	10	6	8331.62	1766	10	6	8331.62	2135	10	6	8331.5	1901	10	6	8331.5	3926	10	6	8331.62	4185	10	6	8331.5	4671	10	6	8331.5	4165
10	7	8332.51	851	10	7	8332.51	864	10	7	8332.51	1076	10	7	8332.51	1027	10	7	8332.51	1051	10	7	8332.38	1276	10	7	8332.51	2166	10	7	8332.51	2387	10	7	8332.51	2945	10	7	8332.51	2762
10	8	8333.39	254	10	8	8333.39	239	10	8	8333.52	454	10	8	8333.65	695	10	8	8333.39	771	10	8	8333.52	1057	10	8	8333.65	1331	10	8	8333.52	1689	10	8	8333.52	1401	10	8	8333.52	1440
10	9	8334.66	166	10	9	8334.53	247	10	9	8334.53	247	10	9	8334.53	266	10	9	8334.53	408	10	9	8334.53	532	10	9	8334.53	569	10	9	8334.66	693	10	9	8334.53	1195	10	9	8334.53	909
10	10	8335.54	150	10	10	8335.42	191	10	10	8335.8	176	10	10	8335.42	229	10	10	8335.67	436	10	10	8335.54	163	10	10	8335.54	459	10	10	8335.42	362	10	10	8335.42	465	10	10	8335.54	490
10	11	8336.56	64	10	11	8336.43	59	10	11	8336.56	203	10	11	0	0	10	11	8336.56	124	10	11	8336.3	129	10	11	8336.56	245	10	11	8336.68	101	10	11	8336.68	182	10	11	8336.56	251
10	12	8337.57	55	10	12	0	0	10	12	8337.44	68	10	12	8337.7	90	10	12	8337.57	58	10	12	8336.94	150	10	12	8337.57	108	10	12	8337.32	82	10	12	8337.57	98	10	12	8337.44	144
10	13	0	0	10	13	0	0	10	13	0	0	10	13	0	0	10	13	8338.45	89	10	13	8339.34	55	10	13	0	0	10	13	8338.2	105	10	13	8338.2	52	10	13	8338.83	86
10	14	0	0	10	14	0	0	10	14	0	0	10	14	0	0	10	14	0	0	10	14	0	0	10	14	0	0	10	14	0	0	10	14	8339.47	57	10	14	8339.34	87
9	0	8325.49	106	9	0	8325.49	186	9	0	8325.49	168	9	0	8325.37	319	9	0	8325.37	281	9	0	8325.61	398	9	0	8325.49	612	9	0	8325.49	435	9	0	8325.37	600	9	0	8325.37	450
9	1	8326.69	242	9	1	8326.45	500	9	1	8326.57	634	9	1	8326.45	797	9	1	8326.57	849	9	1	8326.45	1197	9	1	8326.57	1906	9	1	8326.45	1856	9	1	8326.57	2079	9	1	8326.57	2019
9	2	8327.53	671	9	2	8327.53	954	9	2	8327.53	1127	9	2	8327.53	896	9	2	8327.53	1427	9	2	8327.53	2370	9	2	8327.53	2935	9	2	8327.53	3811	9	2	8327.53	4322	9	2	8327.53	3682
9	3	8328.49	854	9	3	8328.49	907	9	3	8328.49	1672	9	3	8328.49	1954	9	3	8328.49	2066	9	3	8328.49	2321	9	3	8328.49	4143	9	3	8328.49	5069	9	3	8328.49	4892	9	3	8328.49	4768
9	4	8329.57	941	9	4	8329.45	1065	9	4	8329.57	1539	9	4	8329.57	1784	9	4	8329.57	2465	9	4	8329.57	2688	9	4	8329.57	4612	9	4	8329.45	4254	9	4	8329.57	4468	9	4	8329.57	4421
9	5	8330.53	647	9	5	8330.53	630	9	5	8330.53	1019	9	5	8330.53	1627	9	5	8330.53	1515	9	5	8330.53	2236	9	5	8330.53	3538	9	5	8330.53	3610	9	5	8330.53	3756	9	5	8330.53	3778
9	6	8331.61	586	9	6	8331.61	628	9	6	8331.49	751	9	6	8331.49	918	9	6	8331.49	880	9	6	8331.49	1342	9	6	8331.61	2220	9	6	8331.49	2923	9	6	8331.49	2122	9	6	8331.49	2714
9	7	8332.45	400	9	7	8332.33	302	9	7	8332.57	532	9	7	8332.69	680	9	7	8332.57	689	9	7	8332.57	810	9	7	8332.57	1585	9	7	8332.57	1714	9	7	8332.57	1421	9	7	8332.57	1639
9	8	8333.41	161	9	8	8333.53	249	9	8	8333.53	364	9	8	8333.53	346	9	8	8333.53	344	9	8	8333.29	461	9	8	8333.53	807	9	8	8333.41	950	9	8	8333.53	813	9	8	8333.53	735
9	9	8334.61	123	9	9	8334.61	153	9	9	8334.61	157	9	9	8334.73	195	9	9	8334.61	192	9	9	8334.61	363	9	9	8334.49	551	9	9	8334.61	357	9	9	8334.49	442	9	9	8334.37	511
9	10	0	0	9	10	0	0	9	10	8335.57	196	9	10	8335.57	110	9	10	8335.45	76	9	10	8335.57	337	9	10	8335.45	238	9	10	8335.45	294	9	10	8335.69	135	9	10	8335.57	297
9	11	0	0	9	11	0	0	9	11	0	0	9	11	8336.65	62	9	11	0	0	9	11	8336.53	152	9	11	8336.41	161	9	11	8336.29	120	9	11	8336.53	172	9	11	8336.53	121
9	12	0	0	9	12	0	0	9	12	0	0	9	12	0	0	9	12	0	0	9	12	0	0	9	12	8337.25	64	9	12	8337.13	79	9	12	8338.33	58	9	12	8337.49	67
9	13	0	0	9	13	0	0	9	13	0	0	9	13	0	0	9	13	0	0	9	13	0	0	9	13	0	0	9	13	8338.21	98	9	13	8338.33	58	9	13	8337.97	84
9	14	0	0	9	14	0	0	9	14	0	0	9	14	0	0	9	14	0	0	9	14	0	0	9	14	8339.53	52	9	14	8339.17	65	9	14	8338.81	72	9	14	8340.25	53
8	0	8325.61	78	8	0	8325.49	106	8	0	8325.61	145	8	0	8325.61	108	8	0	8325.38	145	8	0	8325.49	376	8	0	8325.61	340	8	0	8325.61	418	8	0	8325.61	522	8	0	8325.49	520
8	1	8326.51	295	8	1	8326.51	415	8	1	8326.62	331	8	1	8326.51	405	8	1	8326.4	543	8	1	8326.4	767	8	1	8326.62	858	8	1	8326.62	1348	8	1	8326.51	1163	8	1	8326.4	1046
8	2	8327.42	297	8	2	8327.53	506	8	2	8327.42	687	8	2	8327.42	1006	8	2	8327.53	1193	8	2	8327.42	1100	8	2	8327.53	2088	8	2	8327.53	1846	8	2	8327.42	1975	8	2	8327.64	2031
8	3	8328.55	579	8	3	8328.55	687	8	3	8328.32	638	8	3	8328.43	1077	8	3	8328.55	1182	8	3	8328.55	1513	8	3	8328.55	2821	8	3	8328.55	2562	8	3	8328.43	2558	8	3	8328.55	2912
8	4	8329.68	528	8	4	8329.45	671	8	4	8329.57	699	8	4	8329.57	815	8	4	8329.57	1115	8	4	8329.57	1391	8	4	8329.57	2264	8	4	8329.57	2060	8	4	8329.45	2520	8	4	8329.45	2302
8	5	8330.58	335	8	5	8330.47	639	8	5	8330.47	698	8	5	8330.58	738	8	5	8330.47	1115	8	5	8330.58	1065	8	5	8330.47	2185	8	5	8330.47	1970	8	5	8330.58	2105	8	5	8330.47	2149
8	6	8331.49	285	8	6	8331.49	314	8	6	8331.49	534	8	6	8331.6	402	8	6	8331.6	670	8	6	8331.37	774	8	6	8331.6	1620	8	6	8331.49	1542	8	6	8331.49	1453	8	6	8331.37	1307
8	7	8332.28	169	8	7	8332.62	161	8	7	8332.28	318	8	7	8332.51	360	8	7	8332.39	480	8	7	8332.39	539	8	7	8332.51	858	8	7	8332.51	900	8	7	8332.39	977	8	7	8332.62	877
8	8	8333.3	110	8	8	8333.64	114	8	8	8333.3	220	8	8	8333.41	152	8	8	8333.53	269	8	8	8333.53	278	8	8	8333.53	456	8	8	8333.64	754	8	8	8333.64	479	8	8	8333.64	513
8	9	0	0	8	9	8334.54	118	8	9	8334.66	108	8	9	8334.2	107	8	9	8334.43	78	8	9	8334.43	173	8	9	8334.43	342	8	9	8334.54	248	8	9	8334.77	190	8	9	8334.54	207
8	10	0	0	8	10	0	0	8	10	8335.79	60	8	10	8336	55	8	10	8335.45	93	8	10	8335.22	61	8	10	8335.45	214	8	10	8335.67	168	8	10	8335.56	182	8	10	8335.34	203
8	11	0	0	8	11	0	0	8	11	8336.47	56	8	11	0	0	8	11	0	0	8	11	0	0	8	11	8336.35	78	8	11	8335.67	168	8	11	8336.47	119	8	11	8336.81	77
8	12	0	0	8	12	0	0	8	12	0	0	8	12	0	0	8	12	0	0	8	12	0	0	8	12	0	0	8	12	8337.6	71	8	12	8337.37	85	8	12	8337.6	56
8	13	0	0	8	13	0	0	8	13	0	0	8	13	0	0	8	13	0	0	8	13	8338.28	98	8	13	0	0	8	13	8338.5	60	8	13	0	0	8	13	8338.5	53
8	14	0	0	8	14	0	0	8	14	0	0	8	14	0	0	8	14	0	0	8	14	0	0	8	14	8339.3	133	8	14	0	0	8	14	8339.86	52	8	14	8339.3	88
7	0	8325.54	108	7	0	8325.32	86	7	0	0	0	7	0	8325.54	142	7	0	8325.22	110	7	0	8325.43	205	7	0	8325.43	250	7	0	8325.43	187	7	0	8325.43	149	7	0	8325.32	244
7	1	8326.7	141	7	1	8326.49	286	7	1	8326.38	295	7	1	8326.49	327	7	1	8326.38	384	7	1	8326.49	702	7	1	8326.38	673	7	1	8326.28	477	7	1	8326.49	598	7	1	8326.59	564
7	2	8327.55	395	7	2	8327.55	333	7	2	8327.65	387	7	2	8327.55	476	7	2	8327.55	653	7	2	8327.55	618	7	2	8327.44	1034	7	2	8327.55	1448	7	2	8327.44	1310	7	2	8327.55	1392
7	3	8328.61	228	7	3	8328.5	418	7	3	8328.5	573	7	3	8328.61	584	7	3	8328.39	974	7	3	8328.5	840	7	3	8328.5	1344	7	3	8328.5	1375	7	3	8328.61	1566	7	3	8328.5	1475
7	4	8329.56	297	7	4	8329.56	462	7	4	8329.56	520	7	4	8329.56	737	7	4	8329.56	728	7	4	8329.45	1140	7	4	8329.56	1500	7	4	8329.45	1238	7	4	8329.45	1479	7	4	8329.35	1325
7	5	8330.51	260	7	5	8330.4	245	7	5	8330.4	610	7	5	8330.62	570	7	5	8330.51	485	7	5	8330.51	683	7	5	8330.4	1040	7	5	8330.4	916	7	5	8330.4	1107	7	5	8330.4	938
7	6	8331.57	293	7	6	8331.57	270	7	6	8331.57	222	7	6	8331.46	243	7	6	8331.25	509	7	6	8331.57	635	7	6	8331.46	703	7	6	8331.57	707	7	6	8331.57	688	7	6	8331.46	632
7	7	8332.63	61	7	7	8332.63	88	7	7	8332.52	144	7	7	8332.63	277	7	7	8332.52	264	7	7	8332.73	288	7	7	8332.42	445	7	7	8332.42	399	7	7	8332.63	415	7	7	8332.42	432
7	8	8333.47	114	7	8	8333.47	106	7	8	8333.69	75	7	8	8333.37	107	7	8	8333.58	164	7	8	8333.47	284	7	8	8333.58	214	7	8	8333.37	277	7	8	8333.58	306	7	8	8333.69	246
7	9	0	0	7	9	8334.64	87	7	9	8334.53	86	7	9	8334.53	158	7	9	8334.53	194	7	9	8334.64	90	7	9	8334.64	160	7	9	8334.53	192	7	9	8334.43	239	7	9	8334.64	220
7	10	0	0	7	10	0	0	7	10	8335.38	108	7	10	8335.7	172	7	10	8335.38	56	7	10	8335.38	100	7	10	8335.7	78	7	10	8335.48	75	7	10	8335.59	56	7	10	8335.48	114
7	11	0	0	7	11	0	0	7	11	8336.44	67	7	11	8336.65	51	7	11	0	0	7	11	0	0	7	11	8336.65	73	7	11	8336.54	70	7	11	8336.65	86	7	11	0	0
7	12	0	0	7	12	0	0	7	12	0	0	7	12	0	0	7	12	0	0	7	12	0	0	7	12	8337.71	74	7	12	0	0	7	12	8337.6	87	7	12	0	0
7	13	0	0	7	13	0	0	7	13	0	0	7	13	0	0	7	13	0	0	7	13	0	0	7	13	0	0	7	13	0	0	7	13	0	0	7	13	8338.98	133
7	14	0	0	7	14	0	0	7	14	0	0	7	14	0	0	7	14	0	0	7	14	0	0	7	14	8339.4	69	7	14	8339.83	64	7	14	0	0	7	14	8338.98	133
6	0	8325.71	60	6	0	0	0	6	0	8325.42	136	6	0	8325.52	98	6	0	8325.52	137	6	0	8325.32	134	6	0	8325.12	155	6	0	8325.42	349	6	0	8325.32	198	6	0	8325.52	189
6	1	8326.49	210	6	1	8326.59	227	6	1	8326.4	261	6	1	8326.4	214	6	1	8326.3	256	6	1	8326.3	274	6	1	8326.4	567	6	1	8326.4	651	6	1	8326.4	823	6	1	8326.49	554
6	2	8327.38	299	6	2	8327.38	358	6	2	8327.47	441	6	2	8327.57	507	6	2	8327.67	545	6	2	8327.47	654	6	2	8327.38	1026	6	2	8327.47	918	6	2	8327.47	1103	6	2	8327.38	1097
6	3	8328.26	233	6	3	8328.45	362	6	3	8328.45	531	6	3	8328.36	699	6	3	8328.55	819	6	3	8328.55	1024	6	3	8328.45	1479	6	3	8328.45	1506	6	3	8328.45	947	6	3	8328.45	1076
6	4	8329.63	249	6	4	8329.43	405	6	4	8329.43	589	6	4	8329.53	471	6	4	8329.34	748	6	4	8329.43	971	6	4	8329.43	1294	6	4	8329.34	1142	6	4	8329.43	991	6	4	8329.43	1524
6	5	8330.41	338	6	5	8330.51	384	6	5	8330.32	404	6	5	8330.32	505	6	5	8330.41	553	6	5	8330.51	844	6	5	8330.41	1059	6	5	8330.41	941	6	5	8330.51	921	6	5	8330.51	991
6	6	8331.49	190	6	6	8331.59	346	6	6	8331.59	304	6	6	8331.59	392	6	6	8331.39	480	6	6	8331.49	472	6	6	8331.49	794	6	6	8331.49	675	6	6	8331.39	905	6	6	8331.39	908
6	7	8332.18	82	6	7	8332.37	205	6	7	8332.57	151	6	7	8332.28	192	6	7	8332.47	277	6	7	8332.47	375	6	7	8332.47	413	6	7	8332.47	452	6	7	8332.47	591	6	7	8332.57	390
6	8	8333.26	51	6	8	8333.55	61	6	8	8333.35	170	6	8	8333.45	66	6	8	8333.26	124	6	8	8333.35	222	6	8	8333.45	212	6	8	8333.65	182	6	8	8333.55	380	6	8	8333.55	297
6	9	8334.33	110	6	9	8334.53	117	6	9	8334.33	146	6	9	8334.63	205	6	9	8334.53	195	6	9	8334.43	129	6	9	8334.33	148	6	9	8334.53	169	6	9	8334.43	179	6	9	8334.43	143
6	10	0	0	6	10	0	0	6	10	8335.31	89	6	10	8335.61	84	6	10	0	0	6	10	8335.71	60	6	10	8335.61	66	6	10	8335.51	98	6	10	8335.41	85	6	10	8335.41	160
6	11	0	0	6	11	0	0	6	11	0	0	6	11	0	0	6	11	8336.59	72	6	11	8336.49	65	6	11	0	0	6	11	8336.1	71	6	11	8336.29	60	6	11	0	0
6	12	0	0	6	12	0	0	6	12	0	0	6	12	0	0	6	12	0	0	6	12	0	0	6	12	0	0	6	12	8337.37	65	6	12	0	0	6	12	0	0
6	13	0	0	6	13	0	0	6	13	0	0	6	13	0	0	6	13	0	0	6	13	0	0	6	13	0	0	6	13	8338.45	59	6	13	8338.75	63	6	13	8338.84	153
6	14	0	0	6	14	8339.63	78	6	14	0	0	6	14	0	0	6	14	8339.43	86	6	14	0	0	6	14	8339.53	68	6	14	8339.43	55	6	14	0	0	6	14	8339.73	59

## Sheet: DNA_SHORT2
z	Isotope	MW	Intensity	z	Isotope	MW	Intensity	z	Isotope	MW	Intensity	z	Isotope	MW	Intensity	z	Isotope	MW	Intensity	z	Isotope	MW	Intensity	z	Isotope	MW	Intensity	z	Isotope	MW	Intensity	z	Isotope	MW	Intensity	z	Isotope	MW	Intensity	z	Isotope	MW	Intensity	z	Isotope	MW	Intensity	z	Isotope
9	0	6957.2	130	9	0	6957.42	450	9	0	6957.31	1239	9	0	6957.31	1373	9	0	6957.31	3029	9	0	6957.31	4131	9	0	6957.31	5623	9	0	6957.31	6866	9	0	6957.31	8097	9	0	6957.31	8953	9	0	6957.31	10406	9	0	6957.31	10780	9	0
9	1	6958.4	409	9	1	6958.29	937	9	1	6958.29	2562	9	1	6958.29	5470	9	1	6958.29	7171	9	1	6958.29	11794	9	1	6958.29	14522	9	1	6958.29	20203	9	1	6958.29	24595	9	1	6958.29	28274	9	1	6958.29	31086	9	1	6958.29	31017	9	1
9	2	6959.28	716	9	2	6959.28	1528	9	2	6959.28	4329	9	2	6959.28	9261	9	2	6959.28	10791	9	2	6959.28	14817	9	2	6959.28	20440	9	2	6959.28	25433	9	2	6959.28	36729	9	2	6959.28	42113	9	2	6959.28	48301	9	2	6959.28	50783	9	2
9	3	6960.27	676	9	3	6960.27	2089	9	3	6960.27	4115	9	3	6960.27	8422	9	3	6960.27	11280	9	3	6960.27	18580	9	3	6960.27	22231	9	3	6960.27	31171	9	3	6960.27	38841	9	3	6960.27	44156	9	3	6960.27	53571	9	3	6960.27	54595	9	3
9	4	6961.36	746	9	4	6961.36	1382	9	4	6961.25	3502	9	4	6961.25	7315	9	4	6961.25	10784	9	4	6961.25	13601	9	4	6961.25	17667	9	4	6961.25	27195	9	4	6961.25	32360	9	4	6961.25	36059	9	4	6961.25	41657	9	4	6961.25	44671	9	4
9	5	6962.24	286	9	5	6962.35	928	9	5	6962.35	2302	9	5	6962.35	4876	9	5	6962.35	7708	9	5	6962.24	9191	9	5	6962.24	13054	9	5	6962.35	17769	9	5	6962.24	21963	9	5	6962.24	25871	9	5	6962.24	28573	9	5	6962.24	28538	9	5
9	6	6963.34	308	9	6	6963.23	468	9	6	6963.34	1462	9	6	6963.34	2678	9	6	6963.34	3821	9	6	6963.34	6557	9	6	6963.34	7858	9	6	6963.34	10115	9	6	6963.34	13221	9	6	6963.34	14587	9	6	6963.23	17273	9	6	6963.23	17146	9	6
9	7	6964.32	137	9	7	6964.32	536	9	7	6964.43	762	9	7	6964.32	1680	9	7	6964.22	2008	9	7	6964.32	2727	9	7	6964.32	3946	9	7	6964.22	5100	9	7	6964.32	6825	9	7	6964.32	7872	9	7	6964.32	8887	9	7	6964.32	9213	9	7
9	8	6965.31	188	9	8	6965.09	218	9	8	6965.31	424	9	8	6965.2	756	9	8	6965.2	857	9	8	6965.42	1743	9	8	6965.31	2066	9	8	6965.31	2735	9	8	6965.31	2831	9	8	6965.31	4082	9	8	6965.31	4068	9	8	6965.31	5553	9	8
9	9	6966.19	63	9	9	6966.19	121	9	9	6966.19	186	9	9	6966.41	300	9	9	6966.41	375	9	9	6966.3	772	9	9	6966.3	1398	9	9	6966.3	1321	9	9	6966.3	1292	9	9	6966.3	2117	9	9	6966.3	2092	9	9	6966.3	1718	9	9
9	10	0	0	9	10	6967.18	68	9	10	6967.4	51	9	10	6967.29	128	9	10	6967.29	384	9	10	6967.4	261	9	10	6967.29	326	9	10	6967.4	442	9	10	6967.07	586	9	10	6967.4	616	9	10	6967.29	855	9	10	6967.29	968	9	10
9	11	6968.27	75	9	11	0	0	9	11	6968.27	62	9	11	6968.38	92	9	11	6968.38	125	9	11	6968.27	213	9	11	6968.6	218	9	11	6968.27	170	9	11	6968.27	435	9	11	6968.38	788	9	11	6968.27	616	9	11	6968.27	435	9	11
9	12	6969.04	60	9	12	0	0	9	12	0	0	9	12	6968.38	92	9	12	6969.26	93	9	12	6969.26	204	9	12	6969.15	85	9	12	6969.37	164	9	12	6969.37	250	9	12	6969.37	180	9	12	6969.7	192	9	12	6969.59	144	9	12
9	13	0	0	9	13	0	0	9	13	0	0	9	13	6970.58	77	9	13	6970.36	104	9	13	6970.14	55	9	13	6970.58	54	9	13	0	0	9	13	6970.03	138	9	13	6970.36	203	9	13	6970.58	71	9	13	6970.47	147	9	13
9	14	6971.46	64	9	14	0	0	9	14	0	0	9	14	6970.58	77	9	14	6971.24	76	9	14	0	0	9	14	6971.35	96	9	14	6971.35	62	9	14	6971.13	79	9	14	6971.24	102	9	14	6971.24	219	9	14	6971.79	152	9	14
8	0	6957.32	274	8	0	6957.42	588	8	0	6957.32	1354	8	0	6957.32	2423	8	0	6957.22	2190	8	0	6957.22	2424	8	0	6957.22	3625	8	0	6957.32	4115	8	0	6957.32	4431	8	0	6957.32	4920	8	0	6957.22	5061	8	0	6957.32	5637	8	0
8	1	6958.25	864	8	1	6958.15	1638	8	1	6958.25	3658	8	1	6958.25	4884	8	1	6958.25	6039	8	1	6958.25	7391	8	1	6958.25	8874	8	1	6958.25	10603	8	1	6958.25	12901	8	1	6958.25	13673	8	1	6958.25	15986	8	1	6958.25	15728	8	1
8	2	6959.28	1098	8	2	6959.28	2746	8	2	6959.28	5048	8	2	6959.28	8227	8	2	6959.28	8817	8	2	6959.28	11351	8	2	6959.28	13807	8	2	6959.28	15421	8	2	6959.28	18933	8	2	6959.28	20697	8	2	6959.28	21988	8	2	6959.28	23205	8	2
8	3	6960.32	1262	8	3	6960.32	2472	8	3	6960.21	6130	8	3	6960.32	8440	8	3	6960.32	9483	8	3	6960.32	13420	8	3	6960.32	14943	8	3	6960.32	17154	8	3	6960.32	19185	8	3	6960.32	21389	8	3	6960.32	23387	8	3	6960.32	24728	8	3
8	4	6961.35	767	8	4	6961.25	2701	8	4	6961.25	5218	8	4	6961.35	6280	8	4	6961.25	8618	8	4	6961.25	9768	8	4	6961.25	12152	8	4	6961.25	14309	8	4	6961.25	16790	8	4	6961.25	17469	8	4	6961.25	18357	8	4	6961.25	22428	8	4
8	5	6962.28	863	8	5	6962.39	1570	8	5	6962.28	3088	8	5	6962.28	4453	8	5	6962.28	5870	8	5	6962.28	7286	8	5	6962.28	7298	8	5	6962.28	10010	8	5	6962.28	10848	8	5	6962.28	12383	8	5	6962.28	14523	8	5	6962.28	14162	8	5
8	6	6963.42	521	8	6	6963.21	986	8	6	6963.32	1802	8	6	6963.21	3302	8	6	6963.21	3419	8	6	6963.32	4549	8	6	6963.32	5278	8	6	6963.32	6208	8	6	6963.32	6606	8	6	6963.21	7068	8	6	6963.32	7179	8	6	6963.32	8668	8	6
8	7	6964.45	329	8	7	6964.35	641	8	7	6964.25	1323	8	7	6964.25	1557	8	7	6964.25	2083	8	7	6964.25	2524	8	7	6964.35	2585	8	7	6964.25	3287	8	7	6964.25	3281	8	7	6964.25	4699	8	7	6964.25	4429	8	7	6964.35	4618	8	7
8	8	6965.49	262	8	8	6965.28	300	8	8	6965.28	623	8	8	6965.28	799	8	8	6965.18	852	8	8	6965.28	1417	8	8	6965.28	1060	8	8	6965.28	1427	8	8	6965.28	1724	8	8	6965.28	2403	8	8	6965.18	1849	8	8	6965.18	2230	8	8
8	9	6966.21	214	8	9	6966.01	98	8	9	6966.32	322	8	9	6966.32	515	8	9	6966.32	585	8	9	6966.21	870	8	9	6966.32	690	8	9	6966.32	926	8	9	6966.32	824	8	9	6966.32	975	8	9	6966.32	1039	8	9	6966.42	1042	8	9
8	10	6967.25	186	8	10	6967.25	146	8	10	6967.04	235	8	10	6967.45	278	8	10	6967.04	186	8	10	6967.14	278	8	10	6967.25	292	8	10	6967.25	187	8	10	6967.35	338	8	10	6967.14	531	8	10	6967.25	614	8	10	6967.25	548	8	10
8	11	0	0	8	11	6968.28	78	8	11	6968.39	163	8	11	6968.28	222	8	11	6968.28	121	8	11	6968.28	151	8	11	6968.07	77	8	11	6968.18	180	8	11	6968.18	284	8	11	6968.28	181	8	11	6968.28	220	8	11	6968.28	130	8	11
8	12	6969.32	121	8	12	0	0	8	12	0	0	8	12	6969.63	72	8	12	0	0	8	12	6969.63	67	8	12	0	0	8	12	6969.21	110	8	12	6969.32	113	8	12	6969.52	100	8	12	6969.21	58	8	12	6969.11	161	8	12
8	13	0	0	8	13	6970.35	69	8	13	0	0	8	13	6970.04	129	8	13	6970.35	51	8	13	6970.14	90	8	13	6970.66	131	8	13	6969.73	54	8	13	6969.73	77	8	13	6970.14	83	8	13	6970.04	96	8	13	6970.35	114	8	13
8	14	0	0	8	14	0	0	8	14	6971.08	53	8	14	6971.8	57	8	14	6971.39	88	8	14	6971.08	72	8	14	6970.66	131	8	14	6971.08	164	8	14	6971.39	111	8	14	6970.97	97	8	14	6971.49	105	8	14	6970.87	67	8	14
7	0	0	0	7	0	6957.34	72	7	0	6957.34	185	7	0	6957.25	215	7	0	6957.44	350	7	0	6957.34	487	7	0	6957.25	819	7	0	6957.34	806	7	0	6957.34	854	7	0	6957.34	1321	7	0	6957.25	1272	7	0	6957.44	1192	7	0
7	1	6958.21	347	7	1	6958.12	146	7	1	6958.31	550	7	1	6958.31	568	7	1	6958.31	782	7	1	6958.31	1033	7	1	6958.31	1862	7	1	6958.31	2377	7	1	6958.31	2792	7	1	6958.31	3133	7	1	6958.31	4258	7	1	6958.21	3870	7	1
7	2	6959.18	99	7	2	6959.18	452	7	2	6959.28	744	7	2	6959.28	932	7	2	6959.28	1490	7	2	6959.18	2208	7	2	6959.28	2683	7	2	6959.28	2766	7	2	6959.28	4145	7	2	6959.28	5414	7	2	6959.28	5639	7	2	6959.28	5871	7	2
7	3	6960.24	164	7	3	6960.24	445	7	3	6960.34	728	7	3	6960.34	1377	7	3	6960.24	1517	7	3	6960.24	1960	7	3	6960.24	2188	7	3	6960.24	3471	7	3	6960.24	4659	7	3	6960.34	5327	7	3	6960.34	5750	7	3	6960.24	7197	7	3
7	4	6961.31	170	7	4	6961.11	427	7	4	6961.31	891	7	4	6961.31	812	7	4	6961.31	1208	7	4	6961.21	1687	7	4	6961.31	1809	7	4	6961.21	3057	7	4	6961.21	3556	7	4	6961.31	4339	7	4	6961.31	5389	7	4	6961.21	4950	7	4
7	5	0	0	7	5	6962.28	394	7	5	6962.08	322	7	5	6962.18	579	7	5	6962.28	746	7	5	6962.28	912	7	5	6962.28	1204	7	5	6962.28	1928	7	5	6962.18	2539	7	5	6962.18	3300	7	5	6962.28	3529	7	5	6962.28	3956	7	5
7	6	6963.34	89	7	6	6963.44	165	7	6	6963.24	382	7	6	6963.15	385	7	6	6963.15	794	7	6	6963.24	897	7	6	6963.24	1303	7	6	6963.34	1091	7	6	6963.44	1499	7	6	6963.34	1805	7	6	6963.24	2154	7	6	6963.24	2178	7	6
7	7	6964.11	104	7	7	6964.4	103	7	7	6964.5	180	7	7	6964.11	302	7	7	6964.21	329	7	7	6964.31	427	7	7	6964.31	424	7	7	6964.31	894	7	7	6964.31	819	7	7	6964.31	1167	7	7	6964.31	1497	7	7	6964.31	1098	7	7
7	8	0	0	7	8	6965.37	85	7	8	6965.47	151	7	8	6965.28	208	7	8	6965.28	128	7	8	6965.08	138	7	8	6965.28	244	7	8	6965.37	281	7	8	6965.37	277	7	8	6965.28	550	7	8	6965.37	427	7	8	6965.28	517	7	8
7	9	6966.34	57	7	9	0	0	7	9	0	0	7	9	0	0	7	9	6966.34	100	7	9	0	0	7	9	6966.34	141	7	9	6966.34	229	7	9	6966.44	211	7	9	6966.05	113	7	9	6966.24	285	7	9	6966.24	296	7	9
7	10	0	0	7	10	6967.21	62	7	10	0	0	7	10	0	0	7	10	6967.4	69	7	10	6967.02	63	7	10	0	0	7	10	6967.79	58	7	10	6967.21	148	7	10	6967.31	112	7	10	6967.5	125	7	10	6967.21	150	7	10
7	11	0	0	7	11	0	0	7	11	0	0	7	11	0	0	7	11	6968.28	100	7	11	0	0	7	11	0	0	7	11	6967.79	58	7	11	6967.6	101	7	11	6968.18	110	7	11	6968.37	146	7	11	6968.28	74	7	11
7	12	0	0	7	12	0	0	7	12	0	0	7	12	0	0	7	12	0	0	7	12	0	0	7	12	0	0	7	12	0	0	7	12	6969.73	53	7	12	0	0	7	12	6969.82	62	7	12	0	0	7	12
7	13	0	0	7	13	0	0	7	13	0	0	7	13	0	0	7	13	6969.92	74	7	13	0	0	7	13	0	0	7	13	0	0	7	13	6969.73	53	7	13	6970.11	59	7	13	6969.82	62	7	13	6970.4	81	7	13
7	14	0	0	7	14	0	0	7	14	0	0	7	14	0	0	7	14	0	0	7	14	0	0	7	14	0	0	7	14	6971.18	66	7	14	0	0	7	14	6971.28	67	7	14	0	0	7	14	6971.28	96	7	14
6	0	0	0	6	0	6957.38	126	6	0	6957.11	118	6	0	6957.2	245	6	0	6957.2	214	6	0	6957.38	277	6	0	6957.29	561	6	0	6957.2	638	6	0	6957.2	624	6	0	6957.2	675	6	0	6957.2	761	6	0	6957.29	738	6	0
6	1	6958.19	107	6	1	6958.37	176	6	1	6958.28	358	6	1	6958.37	506	6	1	6958.37	578	6	1	6958.37	694	6	1	6958.19	885	6	1	6958.28	1666	6	1	6958.28	1703	6	1	6958.28	1759	6	1	6958.28	1832	6	1	6958.28	2328	6	1
6	2	6958.99	84	6	2	6959.35	224	6	2	6959.26	567	6	2	6959.26	700	6	2	6959.35	880	6	2	6959.35	1382	6	2	6959.26	1637	6	2	6959.26	2156	6	2	6959.26	2369	6	2	6959.26	2613	6	2	6959.26	3656	6	2	6959.26	3350	6	2
6	3	6959.98	66	6	3	6960.34	282	6	3	6960.25	501	6	3	6960.34	739	6	3	6960.16	977	6	3	6960.34	992	6	3	6960.25	1541	6	3	6960.34	2077	6	3	6960.25	3125	6	3	6960.25	3094	6	3	6960.25	3074	6	3	6960.25	3434	6	3
6	4	6961.14	151	6	4	6961.23	269	6	4	6961.23	450	6	4	6961.14	460	6	4	6961.32	745	6	4	6961.23	1135	6	4	6961.23	1385	6	4	6961.32	1712	6	4	6961.23	2245	6	4	6961.23	2907	6	4	6961.14	2930	6	4	6961.32	2507	6	4
6	5	6962.04	77	6	5	6962.31	137	6	5	6962.04	223	6	5	6962.04	312	6	5	6962.22	611	6	5	6962.31	708	6	5	6962.31	1090	6	5	6962.31	1078	6	5	6962.31	1556	6	5	6962.31	1603	6	5	6962.22	1955	6	5	6962.22	2039	6	5
6	6	6963.38	73	6	6	6963.11	85	6	6	6963.29	255	6	6	6963.29	301	6	6	6963.47	395	6	6	6963.2	435	6	6	6963.29	620	6	6	6963.29	916	6	6	6963.2	906	6	6	6963.29	1032	6	6	6963.2	1104	6	6	6963.29	1299	6	6
6	7	0	0	6	7	0	0	6	7	6964.28	167	6	7	6964.28	186	6	7	6964.1	151	6	7	6964.28	193	6	7	6964.01	238	6	7	6964.1	462	6	7	6964.37	532	6	7	6964.37	552	6	7	6964.37	522	6	7	6964.1	528	6	7
6	8	0	0	6	8	0	0	6	8	6965.44	82	6	8	6965.27	111	6	8	6965.35	97	6	8	6965	118	6	8	6965.09	149	6	8	6965.09	268	6	8	6965.18	387	6	8	6965.18	320	6	8	6965.35	229	6	8	6965.09	247	6	8
6	9	0	0	6	9	6966.52	59	6	9	0	0	6	9	6966.07	104	6	9	0	0	6	9	6966.25	80	6	9	6966.25	89	6	9	6965.98	74	6	9	6966.34	103	6	9	6966.25	112	6	9	6966.43	127	6	9	6966.16	132	6	9
6	10	0	0	6	10	0	0	6	10	0	0	6	10	6967.24	92	6	10	0	0	6	10	6967.42	55	6	10	6966.97	55	6	10	6967.24	54	6	10	6967.59	76	6	10	6967.24	82	6	10	6967.42	91	6	10	6967.33	167	6	10
6	11	0	0	6	11	0	0	6	11	0	0	6	11	0	0	6	11	0	0	6	11	0	0	6	11	0	0	6	11	0	0	6	11	0	0	6	11	6968.04	66	6	11	6968.76	84	6	11	0	0	6	11
6	12	0	0	6	12	0	0	6	12	0	0	6	12	0	0	6	12	0	0	6	12	0	0	6	12	0	0	6	12	0	0	6	12	0	0	6	12	6969.57	55	6	12	6968.76	84	6	12	6969.75	62	6	12
6	13	0	0	6	13	0	0	6	13	0	0	6	13	0	0	6	13	0	0	6	13	0	0	6	13	6970.37	64	6	13	0	0	6	13	0	0	6	13	0	0	6	13	6970.1	133	6	13	6970.19	55	6	13
6	14	0	0	6	14	0	0	6	14	0	0	6	14	0	0	6	14	0	0	6	14	0	0	6	14	0	0	6	14	6971.18	119	6	14	6971.09	90	6	14	6971.09	91	6	14	6971.27	70	6	14	6970.82	108	6	14
5	0	0	0	5	0	0	0	5	0	6957.13	58	5	0	6957.37	187	5	0	6957.05	215	5	0	6957.13	230	5	0	6957.21	320	5	0	6957.13	417	5	0	6957.21	460	5	0	6957.21	479	5	0	6957.21	730	5	0	6957.21	442	5	0
5	1	6958.11	115	5	1	6958.11	168	5	1	6958.19	314	5	1	6958.19	504	5	1	6958.27	586	5	1	6958.27	841	5	1	6958.19	1052	5	1	6958.19	1308	5	1	6958.19	1562	5	1	6958.27	1318	5	1	6958.27	1401	5	1	6958.27	1478	5	1
5	2	6959.17	125	5	2	6959.33	305	5	2	6959.25	491	5	2	6959.25	692	5	2	6959.17	933	5	2	6959.33	1126	5	2	6959.17	1314	5	2	6959.25	1685	5	2	6959.33	1946	5	2	6959.17	2137	5	2	6959.17	2011	5	2	6959.25	2537	5	2
5	3	6960.15	139	5	3	6960.23	276	5	3	6960.07	408	5	3	6960.15	747	5	3	6960.32	817	5	3	6960.32	1249	5	3	6960.23	1809	5	3	6960.15	2001	5	3	6960.32	2051	5	3	6960.23	2152	5	3	6960.4	1921	5	3	6960.23	2426	5	3
5	4	6961.05	80	5	4	6961.3	322	5	4	6961.13	460	5	4	6961.21	694	5	4	6961.21	739	5	4	6961.21	1179	5	4	6961.3	1310	5	4	6961.21	1500	5	4	6961.3	1747	5	4	6961.3	2083	5	4	6961.13	1915	5	4	6961.21	1916	5	4
5	5	6962.03	76	5	5	6962.2	154	5	5	6962.28	386	5	5	6962.36	356	5	5	6962.2	643	5	5	6962.2	779	5	5	6962.2	998	5	5	6962.36	1027	5	5	6962.2	1123	5	5	6962.36	1478	5	5	6962.28	1381	5	5	6962.28	984	5	5
5	6	0	0	5	6	6963.34	99	5	6	6963.18	218	5	6	6963.18	119	5	6	6963.34	361	5	6	6963.18	365	5	6	6963.18	653	5	6	6963.34	557	5	6	6963.18	762	5	6	6963.26	847	5	6	6963.26	822	5	6	6963.1	688	5	6
5	7	6964.24	57	5	7	6964.16	108	5	7	6964.24	120	5	7	6964.4	158	5	7	6964	153	5	7	6964.32	282	5	7	6964.4	294	5	7	6964.32	361	5	7	6964.32	366	5	7	6964.08	439	5	7	6964.32	609	5	7	6964.24	456	5	7
5	8	6965.3	58	5	8	0	0	5	8	0	0	5	8	0	0	5	8	6965.22	85	5	8	6965.14	133	5	8	6965.06	156	5	8	6965.22	205	5	8	6965.22	323	5	8	6965.14	218	5	8	6965.39	150	5	8	6965.22	248	5	8
5	9	0	0	5	9	0	0	5	9	6966.2	114	5	9	0	0	5	9	0	0	5	9	6966.45	95	5	9	6966.2	110	5	9	6966.2	143	5	9	6966.37	130	5	9	6966.12	153	5	9	6966.45	214	5	9	6966.2	143	5	9
5	10	0	0	5	10	0	0	5	10	0	0	5	10	6967.19	59	5	10	0	0	5	10	6967.51	51	5	10	6967.68	76	5	10	6967.43	123	5	10	6967.35	61	5	10	6966.86	69	5	10	0	0	5	10	6967.02	66	5	10
5	11	0	0	5	11	0	0	5	11	0	0	5	11	0	0	5	11	0	0	5	11	0	0	5	11	0	0	5	11	0	0	5	11	0	0	5	11	6968.25	76	5	11	6968.25	63	5	11	6968.09	55	5	11
5	12	0	0	5	12	0	0	5	12	0	0	5	12	6969.56	51	5	12	0	0	5	12	0	0	5	12	0	0	5	12	0	0	5	12	0	0	5	12	0	0	5	12	6969.23	67	5	12	0	0	5	12
5	13	0	0	5	13	0	0	5	13	0	0	5	13	0	0	5	13	0	0	5	13	0	0	5	13	6970.46	54	5	13	6970.13	76	5	13	6970.38	98	5	13	6970.29	175	5	13	6970.38	87	5	13	6970.29	136	5	13
5	14	0	0	5	14	0	0	5	14	0	0	5	14	0	0	5	14	0	0	5	14	6970.87	65	5	14	6970.95	51	5	14	6971.69	84	5	14	6971.19	94	5	14	6971.36	119	5	14	6971.03	106	5	14	6971.11	168	5	14
[truncated: 6 more columns]

## Sheet: DNA_LONG
z	Isotope	MW	Intensity	z	Isotope	MW	Intensity	z	Isotope	MW	Intensity	z	Isotope	MW	Intensity	z	Isotope	MW	Intensity	z	Isotope	MW	Intensity	z	Isotope	MW	Intensity	z	Isotope	MW	Intensity	z	Isotope	MW	Intensity	z	Isotope	MW	Intensity	z	Isotope	MW	Intensity	z	Isotope	MW	Intensity	z	Isotope
18	0	0	0	18	0	0	0	18	0	14426.5	150	18	0	14426.7	305	18	0	0	0	18	0	14426.2	119	18	0	0	0	18	0	14426	208	18	0	0	0	18	0	0	0	18	0	0	0	18	0	14426.2	276	18	0
18	1	14427.1	129	18	1	0	0	18	1	0	0	18	1	14427.8	225	18	1	0	0	18	1	0	0	18	1	14427.6	478	18	1	0	0	18	1	14427.4	839	18	1	14427.6	1089	18	1	14427.4	867	18	1	0	0	18	1
18	2	0	0	18	2	0	0	18	2	14428	176	18	2	0	0	18	2	0	0	18	2	0	0	18	2	14428.7	1720	18	2	0	0	18	2	14428.5	1360	18	2	14428.5	1977	18	2	14428.5	2009	18	2	0	0	18	2
18	3	0	0	18	3	14429.6	234	18	3	0	0	18	3	14429.6	1076	18	3	14429.4	1412	18	3	14429.6	2360	18	3	14429.6	2805	18	3	14429.6	2963	18	3	0	0	18	3	14429.6	2858	18	3	14429.6	3990	18	3	0	0	18	3
18	4	14430.3	231	18	4	14430.5	157	18	4	0	0	18	4	14430.5	1327	18	4	14430.5	2292	18	4	0	0	18	4	14430.5	5333	18	4	14430.5	4041	18	4	14430.7	4525	18	4	14430.5	4796	18	4	14430.7	5578	18	4	14430.7	6069	18	4
18	5	14431.4	55	18	5	14431.6	481	18	5	14431.4	1066	18	5	14431.6	2472	18	5	14431.6	2864	18	5	14431.6	4875	18	5	14431.6	5435	18	5	14431.6	5923	18	5	14431.6	5980	18	5	14431.6	6659	18	5	14431.6	7023	18	5	14431.6	7260	18	5
18	6	14432.5	140	18	6	14432.7	764	18	6	14432.7	1705	18	6	14432.7	2329	18	6	14432.5	4026	18	6	0	0	18	6	14432.5	5662	18	6	14432.5	5683	18	6	14432.7	7619	18	6	14432.5	6942	18	6	0	0	18	6	14432.7	8674	18	6
18	7	0	0	18	7	0	0	18	7	14433.6	1047	18	7	14433.6	2038	18	7	14433.6	2936	18	7	14433.6	5349	18	7	14433.6	5486	18	7	14433.6	7324	18	7	14433.6	6860	18	7	14433.6	7332	18	7	14433.6	8439	18	7	14433.6	8474	18	7
18	8	14434.5	97	18	8	14434.7	521	18	8	14434.5	1030	18	8	14434.7	1855	18	8	14434.7	2473	18	8	14434.5	4039	18	8	14434.7	4790	18	8	14434.7	5743	18	8	14434.7	5817	18	8	14434.5	7415	18	8	14434.5	8261	18	8	14434.7	8376	18	8
18	9	14435.8	90	18	9	0	0	18	9	14435.6	524	18	9	14435.6	1437	18	9	0	0	18	9	14435.6	3745	18	9	14435.6	3958	18	9	14435.6	4474	18	9	14435.6	4762	18	9	14435.6	5569	18	9	14435.6	6380	18	9	14435.6	5419	18	9
18	10	0	0	18	10	14436.1	309	18	10	14436.5	619	18	10	14436.7	1333	18	10	14436.7	1762	18	10	14436.7	2288	18	10	14436.7	3271	18	10	14436.5	3356	18	10	0	0	18	10	14436.7	4052	18	10	14436.7	3831	18	10	0	0	18	10
18	11	14437.2	121	18	11	14437.4	114	18	11	14437.6	524	18	11	0	0	18	11	0	0	18	11	0	0	18	11	14437.8	1435	18	11	14437.8	1875	18	11	14437.4	2845	18	11	14437.6	3648	18	11	14437.6	2999	18	11	14437.6	3065	18	11
18	12	0	0	18	12	14438.7	160	18	12	14438.7	366	18	12	14438.7	658	18	12	14438.7	649	18	12	0	0	18	12	0	0	18	12	14438.7	1270	18	12	14438.7	1477	18	12	14438.7	1846	18	12	14438.5	1926	18	12	14438.7	2105	18	12
18	13	0	0	18	13	0	0	18	13	14439.6	241	18	13	0	0	18	13	14439.6	904	18	13	0	0	18	13	14439.6	998	18	13	14439.6	1214	18	13	14439.6	1064	18	13	14439.6	1419	18	13	14439.6	982	18	13	14439.6	1597	18	13
18	14	14440.3	88	18	14	0	0	18	14	14440.8	217	18	14	14440.5	139	18	14	14440.5	397	18	14	14440.5	375	18	14	0	0	18	14	0	0	18	14	14440.8	646	18	14	0	0	18	14	0	0	18	14	14440.8	890	18	14
17	0	14426	66	17	0	0	0	17	0	0	0	17	0	0	0	17	0	0	0	17	0	0	0	17	0	0	0	17	0	0	0	17	0	0	0	17	0	0	0	17	0	0	0	17	0	0	0	17	0
17	1	14427.5	203	17	1	14427.5	186	17	1	14427.3	290	17	1	0	0	17	1	0	0	17	1	14427.5	1312	17	1	0	0	17	1	14427.5	1377	17	1	0	0	17	1	0	0	17	1	0	0	17	1	0	0	17	1
17	2	0	0	17	2	0	0	17	2	0	0	17	2	14428.6	1959	17	2	14428.6	2132	17	2	0	0	17	2	0	0	17	2	14428.6	3091	17	2	0	0	17	2	0	0	17	2	14428.6	3657	17	2	0	0	17	2
17	3	14429.7	477	17	3	14429.5	783	17	3	0	0	17	3	0	0	17	3	0	0	17	3	14429.5	5147	17	3	14429.5	4222	17	3	14429.5	5125	17	3	14429.5	6055	17	3	0	0	17	3	0	0	17	3	0	0	17	3
17	4	14430.8	520	17	4	14430.6	944	17	4	0	0	17	4	14430.6	4855	17	4	14430.6	6199	17	4	14430.6	7388	17	4	14430.6	9161	17	4	14430.6	9522	17	4	14430.6	9497	17	4	14430.6	9929	17	4	14430.6	9803	17	4	14430.6	11071	17	4
17	5	14431.6	388	17	5	14431.6	1213	17	5	14431.6	3673	17	5	14431.4	6234	17	5	14431.6	7522	17	5	14431.6	8141	17	5	14431.6	9349	17	5	14431.6	11301	17	5	14431.6	11928	17	5	14431.6	12528	17	5	14431.6	11520	17	5	14431.6	15776	17	5
17	6	0	0	17	6	0	0	17	6	14432.5	3192	17	6	14432.5	5252	17	6	14432.5	7574	17	6	14432.7	9711	17	6	14432.5	11666	17	6	14432.5	11706	17	6	14432.5	12734	17	6	14432.5	13023	17	6	14432.7	13644	17	6	14432.7	15136	17	6
17	7	14433.6	418	17	7	14433.4	1579	17	7	14433.6	3844	17	7	14433.6	6496	17	7	14433.6	8386	17	7	14433.6	8885	17	7	14433.6	9744	17	7	14433.6	12461	17	7	14433.6	12067	17	7	14433.6	12596	17	7	14433.6	14036	17	7	14433.6	15726	17	7
17	8	14434.7	525	17	8	14434.5	1206	17	8	14434.7	3005	17	8	14434.7	5318	17	8	14434.5	7224	17	8	14434.7	7854	17	8	0	0	17	8	0	0	17	8	14434.7	11137	17	8	14434.7	11468	17	8	14434.7	11636	17	8	14434.7	11584	17	8
17	9	14435.5	412	17	9	0	0	17	9	14435.5	2225	17	9	14435.5	3706	17	9	14435.5	5831	17	9	14435.5	6910	17	9	14435.5	8489	17	9	14435.5	8483	17	9	14435.5	8326	17	9	14435.5	9419	17	9	14435.5	9694	17	9	14435.5	9453	17	9
17	10	14436.6	484	17	10	14436.6	727	17	10	0	0	17	10	14436.6	3297	17	10	14436.6	3851	17	10	14436.6	5636	17	10	14436.6	5492	17	10	14436.6	6668	17	10	14436.6	5767	17	10	14436.6	6674	17	10	14436.6	7676	17	10	14436.6	7910	17	10
17	11	0	0	17	11	14437.7	630	17	11	14437.5	1115	17	11	14437.7	2071	17	11	0	0	17	11	14437.7	3028	17	11	14437.7	4837	17	11	14437.7	4222	17	11	14437.7	4375	17	11	14437.5	6060	17	11	0	0	17	11	14437.7	4656	17	11
17	12	0	0	17	12	14438.8	613	17	12	14438.6	1130	17	12	14438.6	2166	17	12	14438.6	1992	17	12	0	0	17	12	0	0	17	12	0	0	17	12	0	0	17	12	14438.6	3205	17	12	14438.6	3573	17	12	14438.6	3468	17	12
17	13	14439.2	183	17	13	0	0	17	13	0	0	17	13	0	0	17	13	0	0	17	13	0	0	17	13	0	0	17	13	0	0	17	13	14439.7	2412	17	13	14439.7	2033	17	13	0	0	17	13	14439.7	2195	17	13
17	14	0	0	17	14	14440.5	275	17	14	14440.5	453	17	14	14440.5	537	17	14	0	0	17	14	14440.5	1155	17	14	0	0	17	14	0	0	17	14	0	0	17	14	14440.5	1497	17	14	0	0	17	14	14440.8	1470	17	14
16	0	14426	106	16	0	0	0	16	0	14426.2	198	16	0	0	0	16	0	0	0	16	0	14426.2	422	16	0	0	0	16	0	0	0	16	0	0	0	16	0	0	0	16	0	0	0	16	0	14426.2	146	16	0
16	1	0	0	16	1	14427.5	200	16	1	0	0	16	1	0	0	16	1	0	0	16	1	0	0	16	1	0	0	16	1	0	0	16	1	0	0	16	1	0	0	16	1	0	0	16	1	0	0	16	1
16	2	14428.6	225	16	2	14428.6	780	16	2	14428.6	977	16	2	14428.6	1663	16	2	14428.6	1470	16	2	0	0	16	2	14428.6	2287	16	2	14428.6	2124	16	2	0	0	16	2	0	0	16	2	0	0	16	2	0	0	16	2
16	3	14429.6	925	16	3	0	0	16	3	14429.6	1981	16	3	14429.6	2366	16	3	14429.6	3377	16	3	0	0	16	3	14429.6	3341	16	3	14429.6	4158	16	3	14429.6	4276	16	3	0	0	16	3	14429.6	4888	16	3	14429.6	4618	16	3
16	4	14430.5	901	16	4	14430.7	2177	16	4	0	0	16	4	14430.7	5108	16	4	14430.7	5454	16	4	14430.5	5645	16	4	0	0	16	4	0	0	16	4	14430.7	7510	16	4	14430.5	7012	16	4	14430.5	7337	16	4	14430.7	6595	16	4
16	5	14431.7	689	16	5	14431.7	1858	16	5	14431.5	3765	16	5	14431.7	5054	16	5	14431.5	5090	16	5	14431.5	6608	16	5	14431.5	7191	16	5	14431.5	7634	16	5	14431.7	8904	16	5	0	0	16	5	14431.7	7830	16	5	14431.7	8798	16	5
16	6	14432.8	832	16	6	14432.6	2475	16	6	14432.6	4594	16	6	14432.6	5944	16	6	14432.6	6226	16	6	14432.6	8513	16	6	14432.8	8399	16	6	14432.6	8388	16	6	14432.6	8743	16	6	14432.8	8613	16	6	14432.8	7727	16	6	14432.6	8875	16	6
16	7	14433.8	1203	16	7	0	0	16	7	14433.4	3341	16	7	14433.6	5145	16	7	14433.6	6484	16	7	14433.6	7631	16	7	14433.6	8479	16	7	14433.6	7787	16	7	14433.6	8739	16	7	14433.6	9504	16	7	14433.6	7867	16	7	14433.6	10999	16	7
16	8	0	0	16	8	14434.5	2194	16	8	14434.7	3462	16	8	14434.7	5043	16	8	14434.7	5610	16	8	14434.7	7114	16	8	0	0	16	8	14434.7	7554	16	8	14434.7	8188	16	8	14434.7	7608	16	8	14434.7	9299	16	8	14434.7	9294	16	8
16	9	14435.5	736	16	9	14435.5	2027	16	9	14435.5	2810	16	9	14435.7	4012	16	9	0	0	16	9	14435.5	5043	16	9	14435.7	5532	16	9	14435.7	5879	16	9	14435.5	5687	16	9	14435.5	6424	16	9	14435.7	5701	16	9	14435.5	7296	16	9
16	10	14436.8	487	16	10	14436.8	1009	16	10	14436.8	2379	16	10	14436.6	3114	16	10	14436.6	3365	16	10	14436.6	3764	16	10	0	0	16	10	14436.6	5129	16	10	0	0	16	10	14436.6	4806	16	10	14436.6	4356	16	10	14436.6	5066	16	10
16	11	0	0	16	11	0	0	16	11	0	0	16	11	14437.6	2286	16	11	14437.6	2157	16	11	14437.6	2915	16	11	14437.6	4102	16	11	14437.6	3219	16	11	0	0	16	11	14437.6	3765	16	11	0	0	16	11	14437.6	3539	16	11
16	12	14438.5	245	16	12	14438.7	852	16	12	14438.7	1293	16	12	14438.7	1446	16	12	14438.7	1617	16	12	0	0	16	12	14438.7	2578	16	12	14438.7	1947	16	12	14438.7	2368	16	12	14438.7	2362	16	12	14438.7	2722	16	12	14438.7	2216	16	12
16	13	14439.7	227	16	13	14439.7	417	16	13	0	0	16	13	14439.7	809	16	13	0	0	16	13	0	0	16	13	0	0	16	13	14439.7	1860	16	13	0	0	16	13	14439.7	1246	16	13	0	0	16	13	0	0	16	13
16	14	14440.8	101	16	14	14440.6	359	16	14	14440.6	414	16	14	14440.6	783	16	14	0	0	16	14	14440.6	472	16	14	14440.8	643	16	14	14440.8	1011	16	14	0	0	16	14	14440.8	737	16	14	14440.6	847	16	14	14440.8	708	16	14
15	0	0	0	15	0	0	0	15	0	14426	53	15	0	14426.2	180	15	0	14426.6	164	15	0	14426.4	81	15	0	14426.4	164	15	0	0	0	15	0	14426.2	90	15	0	0	0	15	0	0	0	15	0	14426.6	148	15	0
15	1	14427.4	148	15	1	14427.6	219	15	1	14427.2	135	15	1	14427.6	381	15	1	14427.4	310	15	1	14427.6	268	15	1	0	0	15	1	14427.4	316	15	1	14427.8	332	15	1	0	0	15	1	14427.6	359	15	1	0	0	15	1
15	2	0	0	15	2	0	0	15	2	0	0	15	2	14428.6	531	15	2	0	0	15	2	0	0	15	2	14428.6	591	15	2	0	0	15	2	0	0	15	2	0	0	15	2	0	0	15	2	14428.6	785	15	2
15	3	14429.4	173	15	3	14429.4	491	15	3	0	0	15	3	14429.6	1045	15	3	14429.4	1142	15	3	0	0	15	3	14429.6	1653	15	3	0	0	15	3	14429.4	1206	15	3	0	0	15	3	14429.6	1505	15	3	14429.4	1340	15	3
15	4	14430.7	390	15	4	14430.5	1028	15	4	14430.7	1108	15	4	14430.5	1272	15	4	14430.7	1311	15	4	0	0	15	4	14430.7	1191	15	4	14430.7	1953	15	4	14430.5	1587	15	4	14430.7	1269	15	4	14430.5	1496	15	4	14430.5	1163	15	4
15	5	14431.7	443	15	5	14431.5	521	15	5	14431.5	879	15	5	14431.7	1717	15	5	14431.5	1440	15	5	14431.5	2734	15	5	14431.7	2046	15	5	14431.7	2721	15	5	14431.5	1996	15	5	14431.7	2210	15	5	14431.7	2072	15	5	14431.7	2501	15	5
15	6	14432.5	389	15	6	14432.7	684	15	6	14432.7	1404	15	6	14432.5	1412	15	6	14432.7	2142	15	6	14432.7	2286	15	6	14432.7	2028	15	6	14432.5	2420	15	6	14432.7	2566	15	6	14432.7	1890	15	6	14432.7	2857	15	6	14432.5	2249	15	6
15	7	14433.7	646	15	7	14433.5	777	15	7	14433.5	1687	15	7	14433.7	1805	15	7	0	0	15	7	14433.7	2244	15	7	14433.7	2143	15	7	14433.5	3326	15	7	14433.7	2622	15	7	14433.5	2479	15	7	14433.5	2742	15	7	14433.7	2253	15	7
15	8	14434.5	373	15	8	0	0	15	8	0	0	15	8	14434.7	1691	15	8	14434.7	1138	15	8	14434.5	2604	15	8	14434.5	2141	15	8	14434.5	1953	15	8	14434.5	2536	15	8	0	0	15	8	14434.7	2046	15	8	14434.5	2275	15	8
15	9	14435.8	315	15	9	14435.6	503	15	9	14435.3	821	15	9	14435.6	944	15	9	14435.6	921	15	9	14435.8	1241	15	9	14435.6	2003	15	9	0	0	15	9	14435.6	2155	15	9	14435.8	1741	15	9	0	0	15	9	14435.6	2233	15	9
15	10	14436.8	526	15	10	14436.6	800	15	10	14436.8	608	15	10	14436.6	1053	15	10	14436.6	633	15	10	14436.6	1117	15	10	0	0	15	10	14436.6	1288	15	10	14436.6	1068	15	10	14436.6	1107	15	10	14436.6	1315	15	10	14436.6	1464	15	10
15	11	0	0	15	11	14437.6	191	15	11	0	0	15	11	0	0	15	11	14437.6	928	15	11	14437.6	868	15	11	14437.6	859	15	11	14437.6	1085	15	11	14437.6	849	15	11	0	0	15	11	14437.8	661	15	11	0	0	15	11
15	12	14438	269	15	12	0	0	15	12	14438.6	357	15	12	14438.6	235	15	12	14438.6	482	15	12	14438.6	321	15	12	14438.6	577	15	12	14438.6	703	15	12	0	0	15	12	14438.6	423	15	12	14438.8	544	15	12	14438.6	616	15	12
15	13	14439.6	187	15	13	14439.6	329	15	13	14439.6	405	15	13	14439.6	355	15	13	14439.8	361	15	13	14439.4	294	15	13	14439.6	526	15	13	0	0	15	13	0	0	15	13	14439.4	483	15	13	14439.8	411	15	13	14439.8	463	15	13
15	14	0	0	15	14	0	0	15	14	0	0	15	14	0	0	15	14	0	0	15	14	14440.9	250	15	14	14440.4	283	15	14	14440.4	151	15	14	14440.9	187	15	14	14440.9	310	15	14	0	0	15	14	0	0	15	14
[truncated: 42 more columns]

## Sheet: RNA_LIKE
z	Isotope	MW	Intensity	z	Isotope	MW	Intensity	z	Isotope	MW	Intensity	z	Isotope	MW	Intensity	z	Isotope	MW	Intensity	z	Isotope	MW	Intensity	z	Isotope	MW	Intensity	z	Isotope	MW	Intensity	z	Isotope	MW	Intensity	z	Isotope	MW	Intensity	z	Isotope	MW	Intensity	z	Isotope	MW	Intensity
8	0	6275.93	3049	8	0	6276.03	3274	8	0	6276.03	2953	8	0	6275.93	2667	8	0	6276.03	3189	8	0	6276.03	2846	8	0	6276.03	3458	8	0	6276.03	2953	8	0	6276.03	2795	8	0	6275.93	3262	8	0	6275.93	2703	8	0	6276.03	3108
8	1	6277.01	5041	8	1	6277.01	6658	8	1	6277.01	6519	8	1	6277.01	8204	8	1	6277.01	7728	8	1	6277.01	7847	8	1	6277.01	7523	8	1	6277.01	8035	8	1	6277.01	7282	8	1	6277.01	7497	8	1	6277.01	6023	8	1	6277.01	6382
8	2	6277.99	8399	8	2	6277.99	10097	8	2	6277.99	9555	8	2	6277.99	10416	8	2	6277.99	10724	8	2	6277.99	11935	8	2	6277.99	10439	8	2	6277.99	11307	8	2	6277.99	10293	8	2	6277.99	8987	8	2	6277.99	9526	8	2	6277.99	8772
8	3	6278.98	9014	8	3	6278.98	9988	8	3	6278.98	9974	8	3	6278.98	10476	8	3	6278.98	12584	8	3	6278.98	12858	8	3	6278.98	11703	8	3	6278.98	11193	8	3	6279.07	9029	8	3	6278.98	9869	8	3	6278.98	9107	8	3	6278.98	9164
8	4	6279.96	6800	8	4	6280.06	8003	8	4	6280.06	7241	8	4	6280.06	8278	8	4	6280.06	9440	8	4	6279.96	10065	8	4	6279.96	8260	8	4	6279.96	8747	8	4	6280.06	8493	8	4	6279.96	8027	8	4	6279.96	7628	8	4	6279.96	7520
8	5	6281.04	4306	8	5	6281.04	5065	8	5	6281.04	5376	8	5	6281.04	6544	8	5	6281.04	6092	8	5	6280.94	5658	8	5	6281.04	5087	8	5	6281.04	5533	8	5	6280.94	5020	8	5	6281.04	5543	8	5	6281.04	5119	8	5	6281.04	4454
8	6	6282.02	3564	8	6	6282.02	3313	8	6	6282.02	3827	8	6	6282.02	3165	8	6	6282.02	4064	8	6	6282.02	3318	8	6	6282.02	3793	8	6	6282.02	3759	8	6	6282.02	3352	8	6	6282.02	4118	8	6	6282.02	3425	8	6	6281.92	2973
8	7	6283	1528	8	7	6283	1694	8	7	6283	2178	8	7	6283	2381	8	7	6282.9	2366	8	7	6283	2387	8	7	6283	1770	8	7	6282.9	1303	8	7	6283	1897	8	7	6283	2082	8	7	6282.9	1653	8	7	6283	1444
8	8	6283.98	1140	8	8	6283.98	1061	8	8	6283.98	922	8	8	6283.98	1031	8	8	6283.98	1286	8	8	6284.08	1327	8	8	6283.98	1380	8	8	6283.98	1354	8	8	6283.98	1037	8	8	6284.08	958	8	8	6283.89	868	8	8	6283.98	778
8	9	6285.07	424	8	9	6284.77	276	8	9	6284.97	471	8	9	6284.97	539	8	9	6284.97	599	8	9	6285.07	529	8	9	6284.87	519	8	9	6285.07	555	8	9	6284.97	469	8	9	6284.97	421	8	9	6284.97	579	8	9	6284.97	621
8	10	6285.95	424	8	10	6285.85	122	8	10	6285.85	89	8	10	6286.15	278	8	10	6286.15	204	8	10	6285.95	274	8	10	6286.05	197	8	10	6286.05	240	8	10	6285.95	329	8	10	6285.95	348	8	10	6286.15	128	8	10	6285.85	235
8	11	6286.93	171	8	11	6286.83	111	8	11	6286.93	249	8	11	6287.03	212	8	11	6286.93	85	8	11	6286.93	103	8	11	6287.03	133	8	11	6287.13	90	8	11	6286.93	171	8	11	6287.03	144	8	11	6287.13	143	8	11	6286.83	167
8	12	6287.82	72	8	12	6287.92	173	8	12	6287.82	141	8	12	0	0	8	12	0	0	8	12	6288.11	96	8	12	6288.01	108	8	12	6288.01	94	8	12	0	0	8	12	0	0	8	12	6287.92	52	8	12	0	0
8	13	6288.8	51	8	13	0	0	8	13	0	0	8	13	6288.8	74	8	13	6289	131	8	13	0	0	8	13	6289	126	8	13	0	0	8	13	6288.9	66	8	13	0	0	8	13	0	0	8	13	0	0
8	14	0	0	8	14	0	0	8	14	6289.98	118	8	14	0	0	8	14	0	0	8	14	6290.08	97	8	14	0	0	8	14	0	0	8	14	0	0	8	14	0	0	8	14	0	0	8	14	0	0
7	0	6275.98	1494	7	0	6275.98	1432	7	0	6275.98	1959	7	0	6275.98	2113	7	0	6275.98	2098	7	0	6276.07	1888	7	0	6275.98	1706	7	0	6276.07	1422	7	0	6275.98	1597	7	0	6275.98	1354	7	0	6275.98	1535	7	0	6275.98	1667
7	1	6276.99	3801	7	1	6276.99	3872	7	1	6276.99	4545	7	1	6276.99	4724	7	1	6276.99	4722	7	1	6276.99	4305	7	1	6277.08	4189	7	1	6276.99	5022	7	1	6277.08	3587	7	1	6276.99	3801	7	1	6276.99	3277	7	1	6276.99	3600
7	2	6278	4557	7	2	6278	5422	7	2	6278	5823	7	2	6278	5386	7	2	6278	7604	7	2	6278	6516	7	2	6278	6119	7	2	6278	5822	7	2	6278	5184	7	2	6278	4814	7	2	6278	5351	7	2	6278	4629
7	3	6279.01	5751	7	3	6279.01	5198	7	3	6279.01	7269	7	3	6279.01	7020	7	3	6279.01	8074	7	3	6279.01	6269	7	3	6279.01	5728	7	3	6279.01	6281	7	3	6279.01	5574	7	3	6279.01	6111	7	3	6278.92	5060	7	3	6279.01	4686
7	4	6280.02	4850	7	4	6280.02	4699	7	4	6280.02	4570	7	4	6280.02	5092	7	4	6279.93	5246	7	4	6280.02	5634	7	4	6280.02	5238	7	4	6279.93	5014	7	4	6280.02	4673	7	4	6280.02	4449	7	4	6280.02	3957	7	4	6280.02	4284
7	5	6281.03	3187	7	5	6281.03	3354	7	5	6281.03	3347	7	5	6280.94	3853	7	5	6280.94	3696	7	5	6281.03	3794	7	5	6280.94	3676	7	5	6281.03	2836	7	5	6280.94	3341	7	5	6280.94	3201	7	5	6281.03	2419	7	5	6280.94	2472
7	6	6282.04	1776	7	6	6281.95	1622	7	6	6281.95	2353	7	6	6282.04	2621	7	6	6282.04	2434	7	6	6281.95	2823	7	6	6281.95	2048	7	6	6281.95	1849	7	6	6282.04	2043	7	6	6282.04	1892	7	6	6281.95	1654	7	6	6282.04	1528
7	7	6282.96	887	7	7	6283.05	1104	7	7	6283.05	1533	7	7	6283.05	992	7	7	6283.05	1401	7	7	6282.96	1234	7	7	6283.05	1413	7	7	6283.05	1186	7	7	6283.05	1018	7	7	6283.05	1093	7	7	6283.05	1091	7	7	6283.05	1107
7	8	6284.06	471	7	8	6284.06	576	7	8	6284.06	605	7	8	6284.06	466	7	8	6283.97	852	7	8	6283.88	681	7	8	6283.97	506	7	8	6283.97	343	7	8	6283.97	601	7	8	6283.97	607	7	8	6284.06	510	7	8	6283.97	541
7	9	6284.98	227	7	9	6285.07	364	7	9	6284.98	283	7	9	6284.98	335	7	9	0	0	7	9	6285.07	431	7	9	6285.07	298	7	9	6284.98	297	7	9	6284.98	232	7	9	6285.07	294	7	9	6284.89	254	7	9	6284.98	234
7	10	6285.9	189	7	10	0	0	7	10	6285.9	172	7	10	0	0	7	10	6285.99	224	7	10	6285.99	122	7	10	6285.9	141	7	10	6285.81	158	7	10	6285.99	186	7	10	6285.9	107	7	10	6285.99	200	7	10	0	0
7	11	6287.1	100	7	11	6286.91	72	7	11	0	0	7	11	6286.73	132	7	11	6287	79	7	11	6287	167	7	11	6287	85	7	11	0	0	7	11	6286.91	62	7	11	0	0	7	11	6286.91	174	7	11	6287	77
7	12	0	0	7	12	6288.11	88	7	12	6288.02	69	7	12	6287.92	68	7	12	0	0	7	12	0	0	7	12	0	0	7	12	0	0	7	12	0	0	7	12	6287.74	60	7	12	0	0	7	12	6287.74	52
7	13	6288.94	106	7	13	0	0	7	13	0	0	7	13	0	0	7	13	0	0	7	13	0	0	7	13	0	0	7	13	0	0	7	13	0	0	7	13	0	0	7	13	0	0	7	13	6288.75	84
7	14	0	0	7	14	0	0	7	14	0	0	7	14	0	0	7	14	0	0	7	14	0	0	7	14	0	0	7	14	0	0	7	14	0	0	7	14	0	0	7	14	0	0	7	14	0	0
6	0	6276.05	734	6	0	6275.97	925	6	0	6276.05	1046	6	0	6275.97	929	6	0	6275.97	1049	6	0	6275.97	1051	6	0	6275.97	989	6	0	6275.97	1182	6	0	6275.97	1037	6	0	6276.05	899	6	0	6275.97	780	6	0	6275.97	780
6	1	6276.99	2413	6	1	6276.99	2326	6	1	6277.08	2072	6	1	6276.99	2684	6	1	6276.99	3070	6	1	6276.99	2490	6	1	6276.99	2569	6	1	6276.99	2614	6	1	6276.99	2345	6	1	6276.91	2082	6	1	6277.08	1814	6	1	6277.08	1773
6	2	6278.01	3074	6	2	6277.93	3022	6	2	6278.01	3407	6	2	6277.93	3190	6	2	6278.01	4049	6	2	6277.93	3512	6	2	6277.93	3837	6	2	6277.93	3446	6	2	6278.01	3493	6	2	6278.01	3103	6	2	6278.01	2924	6	2	6278.01	2817
6	3	6278.95	3660	6	3	6278.95	3079	6	3	6279.03	3747	6	3	6278.95	3586	6	3	6279.03	4104	6	3	6279.03	3588	6	3	6279.03	3620	6	3	6278.95	3217	6	3	6278.95	3589	6	3	6278.95	2741	6	3	6279.03	3009	6	3	6278.86	2924
6	4	6279.97	2636	6	4	6280.05	2583	6	4	6279.97	2864	6	4	6279.97	2921	6	4	6279.97	3062	6	4	6279.97	3045	6	4	6279.97	2967	6	4	6279.97	2730	6	4	6279.97	2407	6	4	6280.05	2485	6	4	6279.97	2402	6	4	6279.97	2706
6	5	6280.9	1719	6	5	6280.99	2065	6	5	6280.99	1963	6	5	6280.99	2022	6	5	6280.99	2311	6	5	6280.99	2192	6	5	6280.99	2303	6	5	6280.99	2172	6	5	6281.07	1683	6	5	6280.99	2071	6	5	6280.99	1498	6	5	6280.9	1722
6	6	6282.01	1002	6	6	6282.01	1391	6	6	6282.01	1127	6	6	6282.01	1303	6	6	6281.92	1257	6	6	6281.92	1275	6	6	6281.92	1288	6	6	6282.01	1024	6	6	6282.01	1003	6	6	6282.01	1301	6	6	6281.92	916	6	6	6281.92	1195
6	7	6283.03	537	6	7	0	0	6	7	6282.95	576	6	7	6283.03	715	6	7	6282.95	813	6	7	6282.95	741	6	7	6283.03	685	6	7	6283.03	749	6	7	6282.95	526	6	7	6282.95	597	6	7	6283.03	556	6	7	6283.03	549
6	8	6284.05	234	6	8	6284.05	201	6	8	6283.97	349	6	8	6283.97	386	6	8	6283.97	533	6	8	6283.97	325	6	8	6283.88	328	6	8	6283.97	192	6	8	6283.88	393	6	8	6283.97	250	6	8	6284.05	266	6	8	6284.05	281
6	9	6285.07	175	6	9	6284.9	128	6	9	6285.07	193	6	9	6285.07	222	6	9	6284.99	216	6	9	6284.9	205	6	9	6284.99	149	6	9	6284.9	140	6	9	6284.82	202	6	9	6284.99	220	6	9	6284.99	150	6	9	6284.9	235
6	10	6285.84	125	6	10	0	0	6	10	6286.01	154	6	10	6285.92	207	6	10	6286.01	122	6	10	6285.92	106	6	10	6285.84	112	6	10	0	0	6	10	6285.92	133	6	10	6286.01	64	6	10	6285.92	111	6	10	6285.75	84
6	11	0	0	6	11	6286.95	64	6	11	0	0	6	11	6286.95	91	6	11	6286.95	120	6	11	0	0	6	11	6286.95	67	6	11	0	0	6	11	0	0	6	11	0	0	6	11	0	0	6	11	0	0
6	12	0	0	6	12	0	0	6	12	6287.97	62	6	12	0	0	6	12	0	0	6	12	0	0	6	12	0	0	6	12	6287.97	79	6	12	0	0	6	12	6288.05	54	6	12	0	0	6	12	0	0
6	13	0	0	6	13	6288.99	54	6	13	0	0	6	13	0	0	6	13	0	0	6	13	0	0	6	13	0	0	6	13	0	0	6	13	0	0	6	13	0	0	6	13	0	0	6	13	0	0
6	14	0	0	6	14	0	0	6	14	0	0	6	14	0	0	6	14	0	0	6	14	0	0	6	14	0	0	6	14	0	0	6	14	0	0	6	14	0	0	6	14	0	0	6	14	0	0
5	0	6275.99	551	5	0	6275.99	661	5	0	6275.91	551	5	0	6275.99	731	5	0	6275.99	581	5	0	6275.91	709	5	0	6275.99	685	5	0	6275.91	573	5	0	6275.99	436	5	0	6275.91	564	5	0	6275.99	493	5	0	6275.99	708
5	1	6277	1349	5	1	6277	1329	5	1	6277	1373	5	1	6276.92	1920	5	1	6277	1553	5	1	6277	1539	5	1	6276.92	2031	5	1	6276.92	1378	5	1	6276.92	1324	5	1	6276.92	1489	5	1	6276.92	1398	5	1	6277	1407
5	2	6277.93	1786	5	2	6277.93	2074	5	2	6277.93	2011	5	2	6278.01	1975	5	2	6278.01	2341	5	2	6277.93	2193	5	2	6277.93	2202	5	2	6278.01	2335	5	2	6278.01	1991	5	2	6278.01	1837	5	2	6277.93	1873	5	2	6278.01	2133
5	3	6279.02	1888	5	3	6278.94	2612	5	3	6279.02	2215	5	3	6279.02	2191	5	3	6279.02	2236	5	3	6278.94	2039	5	3	6278.94	2166	5	3	6279.02	1968	5	3	6278.94	2224	5	3	6279.02	2085	5	3	6278.94	2240	5	3	6279.02	1954
5	4	6279.95	1647	5	4	6279.95	1602	5	4	6279.95	1984	5	4	6279.95	1641	5	4	6280.03	2202	5	4	6279.95	1923	5	4	6280.03	1853	5	4	6280.03	1663	5	4	6279.95	1899	5	4	6279.95	1485	5	4	6279.95	1729	5	4	6279.95	1783
5	5	6280.96	1235	5	5	6280.88	1417	5	5	6280.88	1233	5	5	6280.96	1131	5	5	6281.04	1372	5	5	6280.96	1241	5	5	6280.96	1205	5	5	6280.96	1302	5	5	6280.96	1187	5	5	6280.96	1205	5	5	6280.96	1109	5	5	6280.96	1247
5	6	6282.05	679	5	6	6281.97	928	5	6	6281.97	965	5	6	6281.89	764	5	6	6281.89	717	5	6	6281.97	734	5	6	6281.97	660	5	6	6281.97	618	5	6	6282.05	719	5	6	6281.89	665	5	6	6281.97	686	5	6	6282.05	865
5	7	6282.98	420	5	7	6282.98	404	5	7	6282.9	390	5	7	6282.98	315	5	7	6282.98	413	5	7	6282.98	622	5	7	6282.98	293	5	7	0	0	5	7	6282.98	300	5	7	6283.06	469	5	7	6282.9	498	5	7	6282.9	462
5	8	6283.99	248	5	8	6283.99	166	5	8	6283.91	184	5	8	6283.83	252	5	8	6283.99	266	5	8	6283.91	223	5	8	6283.91	192	5	8	6283.91	234	5	8	6283.91	185	5	8	6283.99	220	5	8	6283.99	220	5	8	6283.83	139
5	9	6284.84	86	5	9	6285	81	5	9	6285	115	5	9	0	0	5	9	0	0	5	9	6284.84	73	5	9	6285	60	5	9	6284.84	120	5	9	0	0	5	9	0	0	5	9	6284.92	180	5	9	6285	109
5	10	6285.85	61	5	10	0	0	5	10	6286.01	68	5	10	6285.93	84	5	10	6285.93	71	5	10	6285.93	75	5	10	0	0	5	10	6285.85	60	5	10	0	0	5	10	6286.01	89	5	10	6285.85	127	5	10	0	0
5	11	6287.02	68	5	11	6286.94	63	5	11	6286.79	69	5	11	0	0	5	11	0	0	5	11	0	0	5	11	0	0	5	11	0	0	5	11	6286.86	73	5	11	0	0	5	11	0	0	5	11	0	0
5	12	0	0	5	12	0	0	5	12	0	0	5	12	6287.95	59	5	12	0	0	5	12	6287.87	80	5	12	6287.87	62	5	12	0	0	5	12	0	0	5	12	0	0	5	12	0	0	5	12	0	0
5	13	0	0	5	13	0	0	5	13	0	0	5	13	0	0	5	13	6288.96	64	5	13	0	0	5	13	6288.88	51	5	13	0	0	5	13	0	0	5	13	0	0	5	13	0	0	5	13	0	0
5	14	6289.82	64	5	14	0	0	5	14	0	0	5	14	0	0	5	14	6289.9	82	5	14	6289.82	74	5	14	6290.05	72	5	14	0	0	5	14	0	0	5	14	6289.9	75	5	14	6289.97	101	5	14	0	0
